# Supplementary material for: Non-invasive peripheral vascular function, incident cardiovascular disease, and mortality in the general population
Source: PubMed Central journal article supplement (PMC8859627; doi:10.1093/cvr/cvab087), 2021-03-16

## **Noninvasive Peripheral Vascular Function, Incident Cardiovascular Disease and Mortality in the General Population**

Renate B. Schnabel, MD, MSc; Christina Magnussen, MD; Andreas Schulz; Francisco M. Ojeda, PhD; Volker H. Schmitt, MD; Natalie Arnold, MD; Christoph R. Sinning, MD; Manfred E. Beutel, MD; Irene Schmidtman, PhD; Norbert Pfeiffer, MD; Anja Leuschner, MD; Karl J. Lackner, MD; Tommaso Gori, MD; Emelia J. Benjamin, MD, ScM; Harald Binder, PhD; Philipp S. Wild, MD; Stefan Blankenberg, MD; Thomas Münzel, MD, FAHA for the Gutenberg Health Study investigators

---

|                               |                                                                                                                                                  |         |
|-------------------------------|--------------------------------------------------------------------------------------------------------------------------------------------------|---------|
| <b>Supplementary Table 1</b>  | Baseline characteristics of individuals with vascular function measurements available and individuals with missing vascular function information | Page 2  |
| <b>Supplementary Table 2</b>  | Baseline characteristics of individuals with intermediate risk of cardiovascular death                                                           | Page 3  |
| <b>Supplementary Table 3</b>  | C-indices in intermediate risk individuals                                                                                                       | Page 4  |
| <b>Supplementary Table 4</b>  | Selected Cox models with ln baseline pulse amplitude                                                                                             | Page 5  |
| <b>Supplementary Table 5</b>  | Baseline characteristics by prevalent cardiovascular disease status                                                                              | Page 6  |
| <b>Supplementary Table 6</b>  | Cox regression analyses in individuals without cardiovascular disease                                                                            | Page 7  |
| <b>Supplementary Figure 1</b> | Survival curves stratified by median vascular function measures                                                                                  | Page 8  |
| <b>Supplementary Figure 2</b> | Vascular function measures in relation to outcomes by risk category                                                                              | Page 9  |
| <b>Supplementary Figure 3</b> | Hazard ratios of baseline pulse amplitude plotted against age.                                                                                   | Page 15 |

---

**Supplementary Table 1.**

| <b>Variable</b>                     | <b>FMD<br/>N=12599</b> | <b>FMD missing<br/>N=2411</b> | <b>PAT<br/>N=11125</b> | <b>PAT missing<br/>N=3885</b> |
|-------------------------------------|------------------------|-------------------------------|------------------------|-------------------------------|
| Age, years                          | 55 (45/64)             | 57 (48/66)                    | 55 (45/64)             | 57 (47/66)                    |
| Women, % (No)                       | 48.9 (6156/12599)      | 52.7 (1270/2411)              | 48.5 (5394/11125)      | 52.3 (2032/3885)              |
| BMI, (kg/m <sup>2</sup> )           | 26.6 (23.9/29.9)       | 26.9 (24.1/31.1)              | 26.5 (23.9/29.8)       | 26.8 (24.0/30.9)              |
| Current smoking, % (No)             | 19.6 (2463/12576)      | 18.7 (448/2399)               | 19.5 (2162/11105)      | 19.4 (749/3870)               |
| Diabetes, % (No)                    | 9.1 (1142/12563)       | 10.6 (253/2392)               | 9.0 (998/11093)        | 10.3 (397/3862)               |
| Dyslipidemia, % (No)                | 34.4 (4328/12570)      | 35.4 (848/2395)               | 34.2 (3802/11103)      | 35.6 (1374/3862)              |
| Lipid-lowering medication,% (No)    | 13.1 (1629/12466)      | 14.9 (355/2390)               | 12.9 (1418/11001)      | 14.7 (566/3855)               |
| Hypertension, % (No)                | 48.9 (6160/12594)      | 54.3 (1306/2407)              | 48.8 (5433/11122)      | 52.4 (2033/3879)              |
| Antihypertensive medication, % (No) | 28.6 (3596/12592)      | 34.7 (834/2401)               | 28.5 (3168/11120)      | 32.6 (1262/3873)              |
| Cardiovascular disease, % (No)      | 12.7 (1584/12486)      | 15.2 (362/2376)               | 12.4 (1368/11027)      | 15.1 (578/3835)               |
| Systolic blood pressure (mm Hg)     | 129.5 (119/141.5)      | 131 (121/144)                 | 129.5 (119/141.5)      | 130.5 (120/143)               |
| Heart rate (bpm)                    | 68 (61.5/75.5)         | 68.5 (62/75.7)                | 68 (61.5/75.5)         | 68 (61.5/76)                  |

Data are presented as median and 25<sup>th</sup>/75<sup>th</sup> percentile for continuous variables and percentage (numbers with condition/total number) for dichotomous variables.

BMI stands for body mass index.

**Supplementary Table 2.** Baseline characteristics of individuals with intermediate 10-year risk of cardiovascular death

| <b>Variable</b>                               | <b>Low risk group<br/>N=11,680</b> | <b>Intermediate risk<br/>group<br/>N=3,239</b> | <b>High risk group<br/>N=20</b> |
|-----------------------------------------------|------------------------------------|------------------------------------------------|---------------------------------|
| Age (years)                                   | 51 (44, 59)                        | 67 (63, 70)                                    | 67 (65/70)                      |
| Women No. (%)                                 | 6680 (57.2)                        | 701 (21.6)                                     | 0                               |
| BMI (kg/m <sup>2</sup> )                      | 26.3 (23.6, 29.9)                  | 27.6 (25.2, 30.5)                              | 28.5 (27.0, 30.5)               |
| Current smoking No. (%)                       | 2164 (18.5)                        | 720 (22.2)                                     | 20 (100)                        |
| Diabetes No. (%)                              | 828 (7.1)                          | 548 (16.9)                                     | 7 (35)                          |
| Dyslipidemia No. (%)                          | 3555 (30.5)                        | 1588 (49.1)                                    | 10 (50)                         |
| Lipid-lowering medication No. (%)             | 1246 (10.8)                        | 725 (22.5)                                     | 1 (5)                           |
| Hypertension No. (%)                          | 4828 (41.3)                        | 2580 (79.7)                                    | 20 (100)                        |
| Antihypertensive medication No. (%)           | 2802 (24)                          | 1593 (49.2)                                    | 8 (40)                          |
| Cardiovascular disease No. (%)                | 1247 (10.7)                        | 684 (21.5)                                     | 1 (5)                           |
| Systolic blood pressure (mm Hg)               | 126 (117, 136.5)                   | 145 (134, 157)                                 | 173 (155.2,177.3)               |
| Heart rate (bpm)                              | 68.5 (62.0, 75.5)                  | 67.5 (60.5, 75.5)                              | 77.0 (64.4, 82.5)               |
| <b><i>Vascular function measures</i></b>      |                                    |                                                |                                 |
| Baseline brachial artery diameter (mm)        | 4.15 (3.6, 4.8)                    | 4.9 (4.4, 5.4)                                 | 5.2 (4.55, 5.4)                 |
| FMD (%)                                       | 7.75 (4.7, 11.6)                   | 6.1 (4, 8.7)                                   | 8.6 (5.5, 12.7)                 |
| Ln baseline pulse amplitude (arbitrary units) | 6.0 (5.3, 6.6)                     | 6.4 (5.8, 6.9)                                 | 6.7 (6.3, 7.2)                  |
| PAT ratio                                     | 0.7 (0.4/0.96)                     | 0.5 (0.2, 0.8)                                 | 0.7 (0.2, 0.2)                  |

Data are presented as median and 25<sup>th</sup>/75<sup>th</sup> percentile for continuous variables and n (percentage) for dichotomous variables.

Abbreviations: BMI, body mass index; FMD, flow mediated dilatation; PAT, peripheral arterial tonometry.

**Supplementary Table 3.** C-indices for the clinical model and vascular function measures in intermediate risk individuals based on SCORE Deutschland (N=3,239)

| Model                                          | <b>C-index<br/>(95% Confidence interval)</b> |
|------------------------------------------------|----------------------------------------------|
| Basic model                                    | 0.695 (0.661, 0.752)                         |
| Base model + baseline brachial artery diameter | 0.700 (0.669, 0.758)                         |
| Base model + FMD                               | 0.703 (0.672, 0.764)                         |
| Base model + ln baseline pulse amplitude       | 0.700 (0.671, 0.765)                         |
| Base model + PAT ratio                         | 0.696 (0.664, 0.760)                         |

Bootstrap analysis with 1000-fold re-sampling was used to correct for over-optimism.

The basic model comprised age, sex, current smoking, body mass index, systolic blood pressure, heart rate, hypertension treatment, diabetes, LDL/HDL cholesterol, lipid treatment, and prevalent cardiovascular disease.

**Supplementary Table 4.** Selected Cox models with ln baseline pulse amplitude

| <b>Beta<br/>(95% CI)</b>  | <b>HR<br/>(95% confidence interval)</b> | <b>P<br/>Value</b> | <b>Predictors</b>                                                                           |
|---------------------------|-----------------------------------------|--------------------|---------------------------------------------------------------------------------------------|
| 0.4199 (0.3490, 0.4908)   | 1.52 (1.42, 1.63)                       | <0.001             | ln baseline pulse amplitude                                                                 |
| 0.3967 (0.3012, 0.4921)   | 1.49 (1.35, 1.64)                       | <0.001             | ln baseline pulse amplitude, male sex                                                       |
| 0.3782 (0.3029, 0.4535)   | 1.46 (1.35, 1.57)                       | <0.001             | ln baseline pulse amplitude, BMI,<br>BMI <sup>2</sup>                                       |
| 0.3113 (0.2376, 0.3850)   | 1.37 (1.27, 1.47)                       | <0.001             | ln baseline pulse amplitude, Systolic<br>BP, Antihypertensive medication                    |
| 0.4369 (0.3658, 0.5081)   | 1.55 (1.44, 1.66)                       | <0.001             | ln baseline pulse amplitude, heart rate                                                     |
| 0.4246 (0.3532, 0.4961)   | 1.53 (1.42, 1.64)                       | <0.001             | ln baseline pulse amplitude, current<br>smoking                                             |
| 0.3879 (0.3146, 0.4611)   | 1.47 (1.37, 1.59)                       | <0.001             | ln baseline pulse amplitude, LDL/HDL,<br>(LDL/HDL) <sup>2</sup> , lipid-lowering medication |
| 0.3505(0.2781, 0.4228)    | 1.42 (1.32, 1.53)                       | <0.001             | ln baseline pulse amplitude, diabetes                                                       |
| 0.3472 (0.2746, 0.4198)   | 1.42 (1.32, 1.52)                       | <0.001             | ln baseline pulse amplitude,<br>cardiovascular disease                                      |
| 0.1962 (0.1228, 0.2696)   | 1.22 (1.13, 1.31)                       | <0.001             | ln baseline pulse amplitude, age                                                            |
| -0.0014 (-0.0998, 0.0969) | 1.00 (0.91, 1.10)                       | 0.98               | ln baseline pulse amplitude, age, male<br>sex                                               |

Beta coefficients and hazard ratios (95% confidence interval) are provided. CI stands for confidence interval.

**Supplementary Table 5.** Baseline characteristics by prevalent cardiovascular disease status

| <b>Variable</b>                               | <b>No CVD<br/>N=12916</b> | <b>Prevalent CVD<br/>N=1946</b> |
|-----------------------------------------------|---------------------------|---------------------------------|
| Age (years)                                   | 54.0 (45.0/63.0)          | 63.0 (53.0/69.0)                |
| Women, % (No.)                                | 51.9 (6703/12916)         | 34.1 (663/1946)                 |
| BMI (kg/m <sup>2</sup> )                      | 26.4 (23.7/29.7)          | 28.3 (25.2/31.5)                |
| Current smoking, % (No.)                      | 19.6 (2526/12900)         | 18.8 (365/1941)                 |
| Diabetes, % (No.)                             | 7.6 (985/12876)           | 19.2 (373/1939)                 |
| Dyslipidemia, % (No.)                         | 31.2 (4021/12888)         | 55.7 (1081/1941)                |
| Lipid-lowering medication, % (No.)            | 9.5 (1214/12780)          | 37.9 (731/1928)                 |
| Hypertension, % (No.)                         | 47.0 (6063/12909)         | 67.3 (1309/1945)                |
| Antihypertensive medication, % (No.)          | 26.0 (3359/12914)         | 51.3 (998/1945)                 |
| Systolic blood pressure (mm Hg)               | 129 (119/141)             | 133 (122/145.5)                 |
| Heart rate (bpm)                              | 68 (62/75.5)              | 67.5 (60/76)                    |
| CVD risk SCORE                                | 1.0 (0/4.0)               | 3.0 (1.0/6.0)                   |
| <b><i>Vascular function measures</i></b>      |                           |                                 |
| Baseline brachial artery diameter (mm)        | 4.27 (3.64/4.90)          | 4.69 (4.07/5.21)                |
| FMD (%)                                       | 7.52 (4.67/11.13)         | 6.24 (3.90/9.34)                |
| Ln baseline pulse amplitude (arbitrary units) | 6.05 (5.33/6.69)          | 6.38 (5.71/6.87)                |
| PAT ratio                                     | 0.68 (0.35/0.95)          | 0.49 (0.19/0.84)                |

Data are presented as median and 25<sup>th</sup>/75<sup>th</sup> percentile for continuous variables and percentage (numbers) for dichotomous variables.

Abbreviations: BMI, body mass index; CVD cardiovascular disease; FMD, flow mediated dilatation; PAT, peripheral arterial tonometry.

**Supplementary Table 6.** Vascular function measures in relation to mortality in multivariable-adjusted Cox regression analyses in individuals without manifest cardiovascular disease, N=12916

| <b>Variable</b>                       | <b>Hazard ratio per standard deviation (95% confidence interval)</b> | <b>P value</b> | <b>N events</b> |
|---------------------------------------|----------------------------------------------------------------------|----------------|-----------------|
| Baseline brachial artery diameter, mm | 0.95 (0.84, 1.07)                                                    | 0.41           | 563             |
| FMD, %                                | 0.99 (0.89, 1.10)                                                    | 0.82           | 519             |
| Ln baseline pulse amplitude           | 0.90 (0.81, 1.01)                                                    | 0.068          | 470             |
| PAT ratio                             | 1.0 (0.91, 1.11)                                                     | 0.94           | 470             |

All models adjusted for age, sex, current smoking, body mass index, systolic blood pressure, heart rate, hypertension treatment, diabetes, LDL/HDL cholesterol and lipid treatment.

**Supplementary Figure 1.** Survival curves stratified by median vascular function measures for baseline brachial artery diameter, FMD, Ln baseline pulse amplitude, and PAT ratio for cardiac mortality (N=106). P-values are for the log rank test.

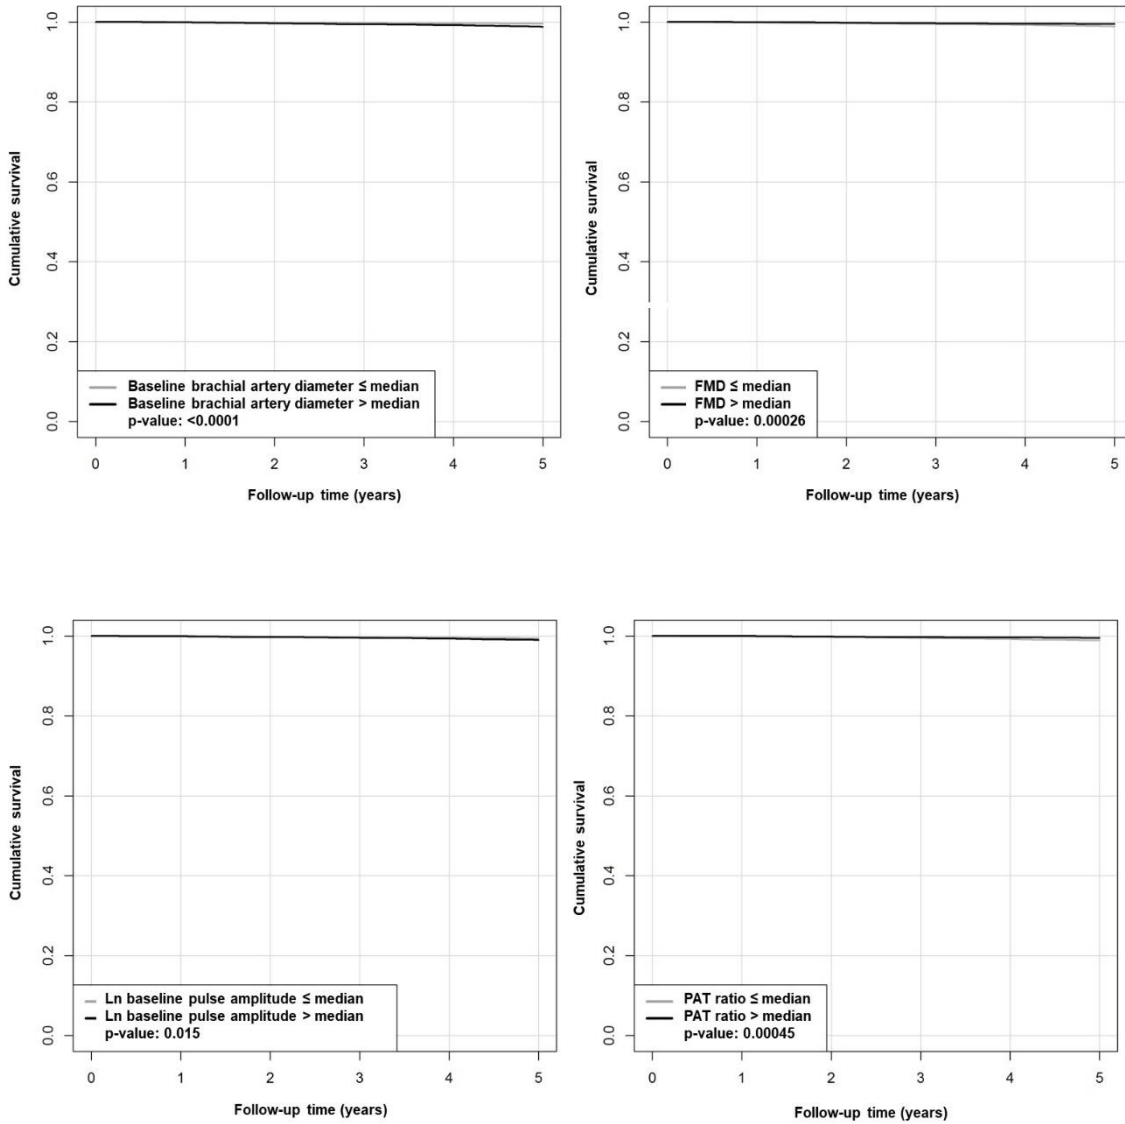



**Supplementary Figure 2.** Vascular function measures in relation to incident cardiovascular disease in multivariable-adjusted Cox regression analyses in the subgroup of individuals with a low ten-year risk of fatal cardiovascular disease (318 events). Provided are hazard ratios per standard deviation increase in vascular function measure and 95% confidence intervals. Hazard ratios (HR) are per standard deviation (SD).

Age- and sex-adjusted and cardiovascular risk factors (CVRF)-adjusted models are presented. The latter include age, sex, current smoking, body mass index, systolic blood pressure, heart rate, hypertension treatment, diabetes, LDL/HDL cholesterol, and lipid treatment. FMD stands for flow-mediated dilatation, PAT for peripheral arterial tonometry.

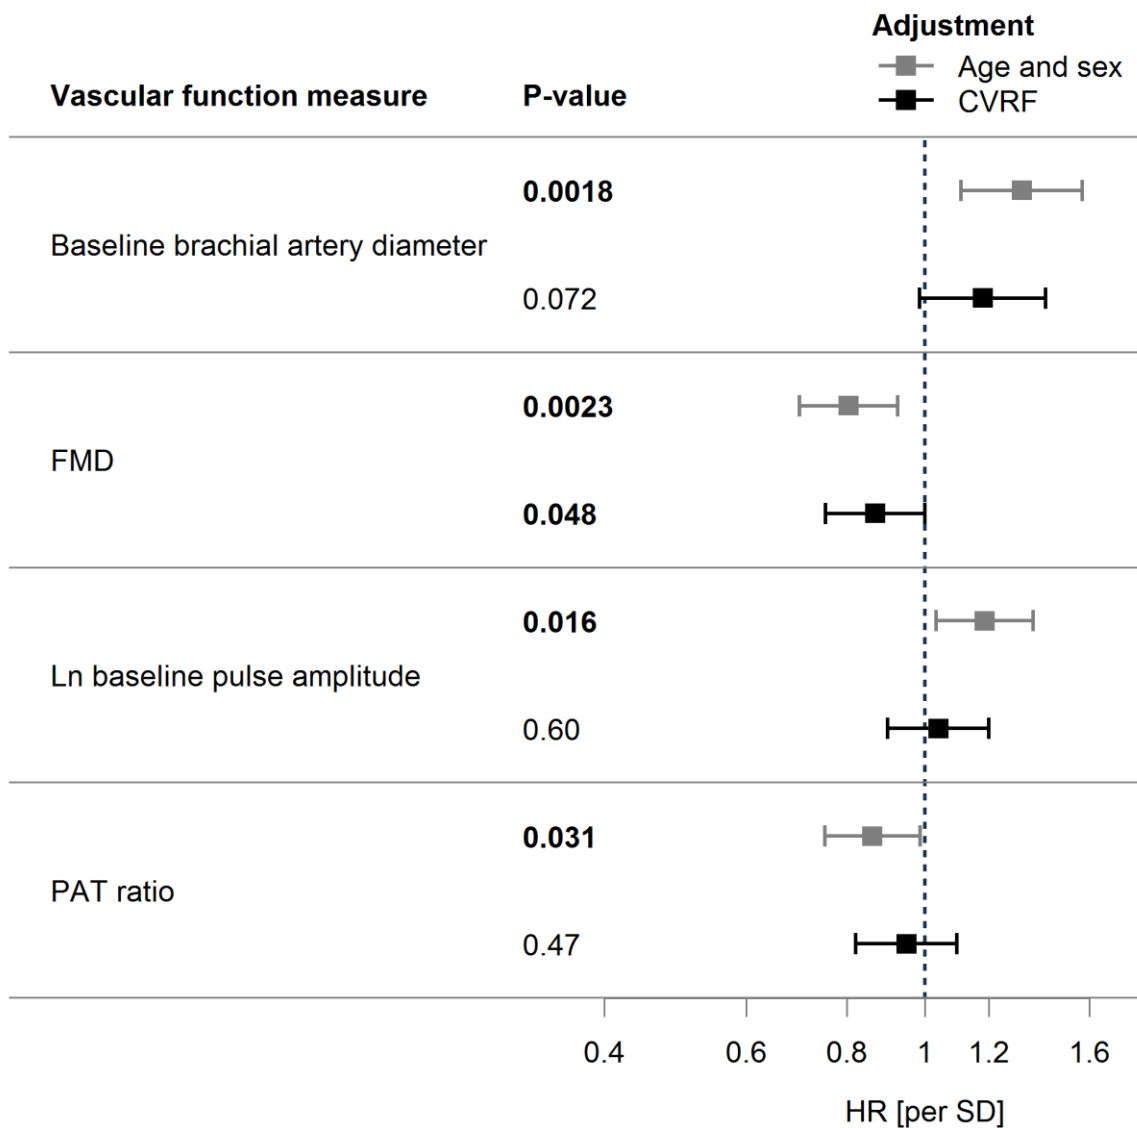

**Supplementary Figure 3.** Vascular function measures in relation to total mortality in multivariable-adjusted Cox regression analyses in the subgroup of individuals with a low ten-year risk of fatal cardiovascular disease (459 events). Provided are hazard ratios per standard deviation increase in vascular function measure and 95% confidence intervals. Hazard ratios (HR) are per standard deviation (SD).

Age- and sex-adjusted and cardiovascular risk factors (CVRF)-adjusted models are presented. The latter include age, sex, current smoking, body mass index, systolic blood pressure, heart rate, hypertension treatment, diabetes, LDL/HDL cholesterol, and lipid treatment. FMD stands for flow-mediated dilatation, PAT for peripheral arterial tonometry.

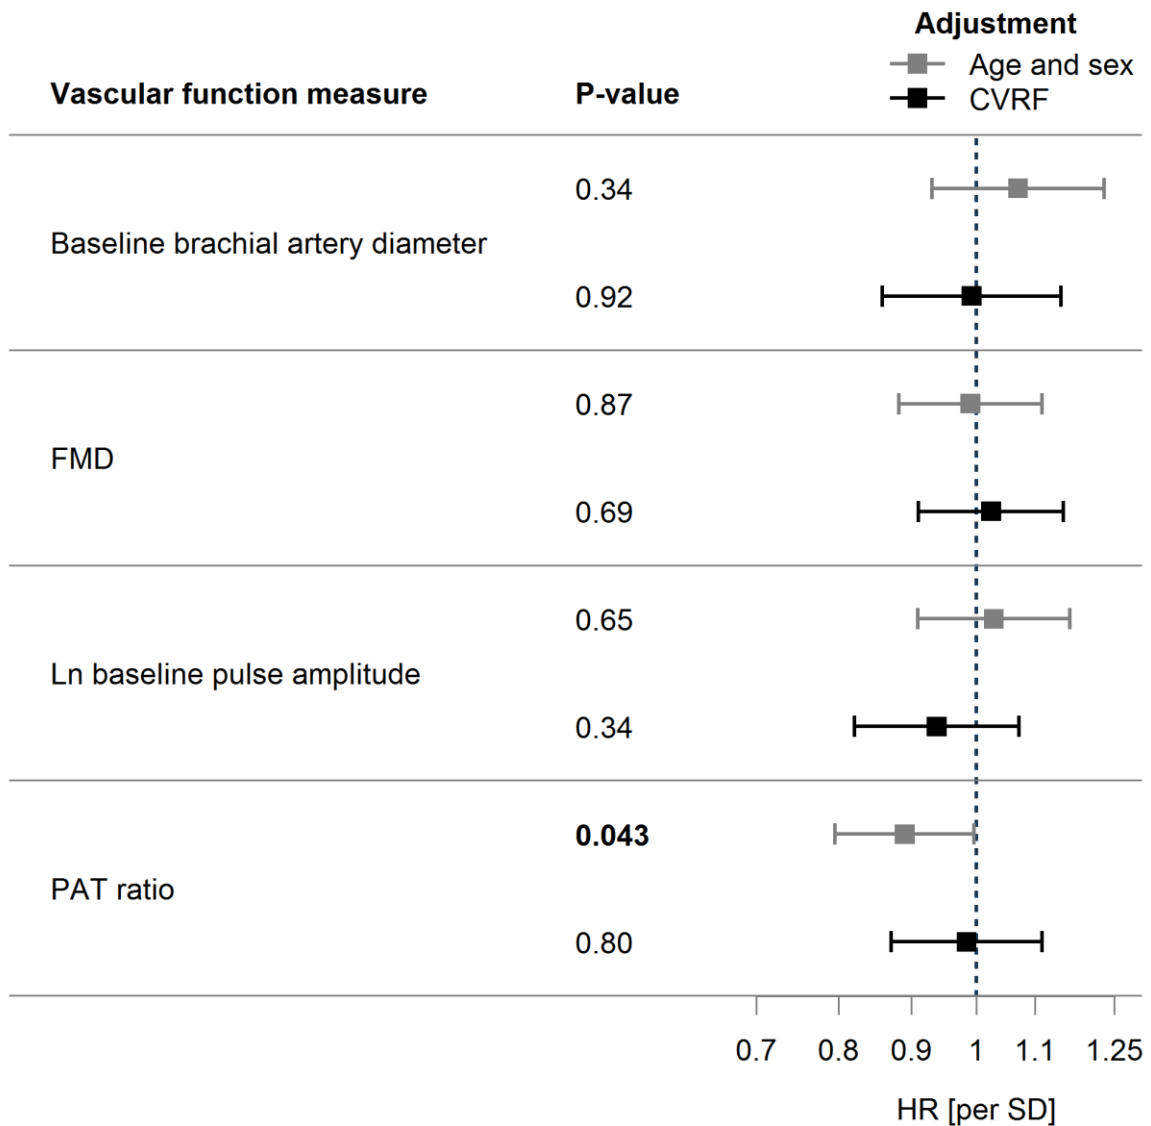

**Supplementary Figure 4.** Vascular function measures in relation to cardiac mortality in multivariable-adjusted Cox regression analyses in the subgroup of individuals with a low ten-year risk of fatal cardiovascular disease (45 deaths). Provided are hazard ratios (HR) per standard deviation (SD) increase in vascular function measure and 95% confidence intervals.

Age- and sex-adjusted and cardiovascular risk factors (CVRF)-adjusted models are presented. The latter include age, sex, current smoking, body mass index, systolic blood pressure, heart rate, hypertension treatment, diabetes, LDL/HDL cholesterol, lipid treatment, and prevalent cardiovascular disease. FMD stands for flow-mediated dilatation, PAT for peripheral arterial tonometry.

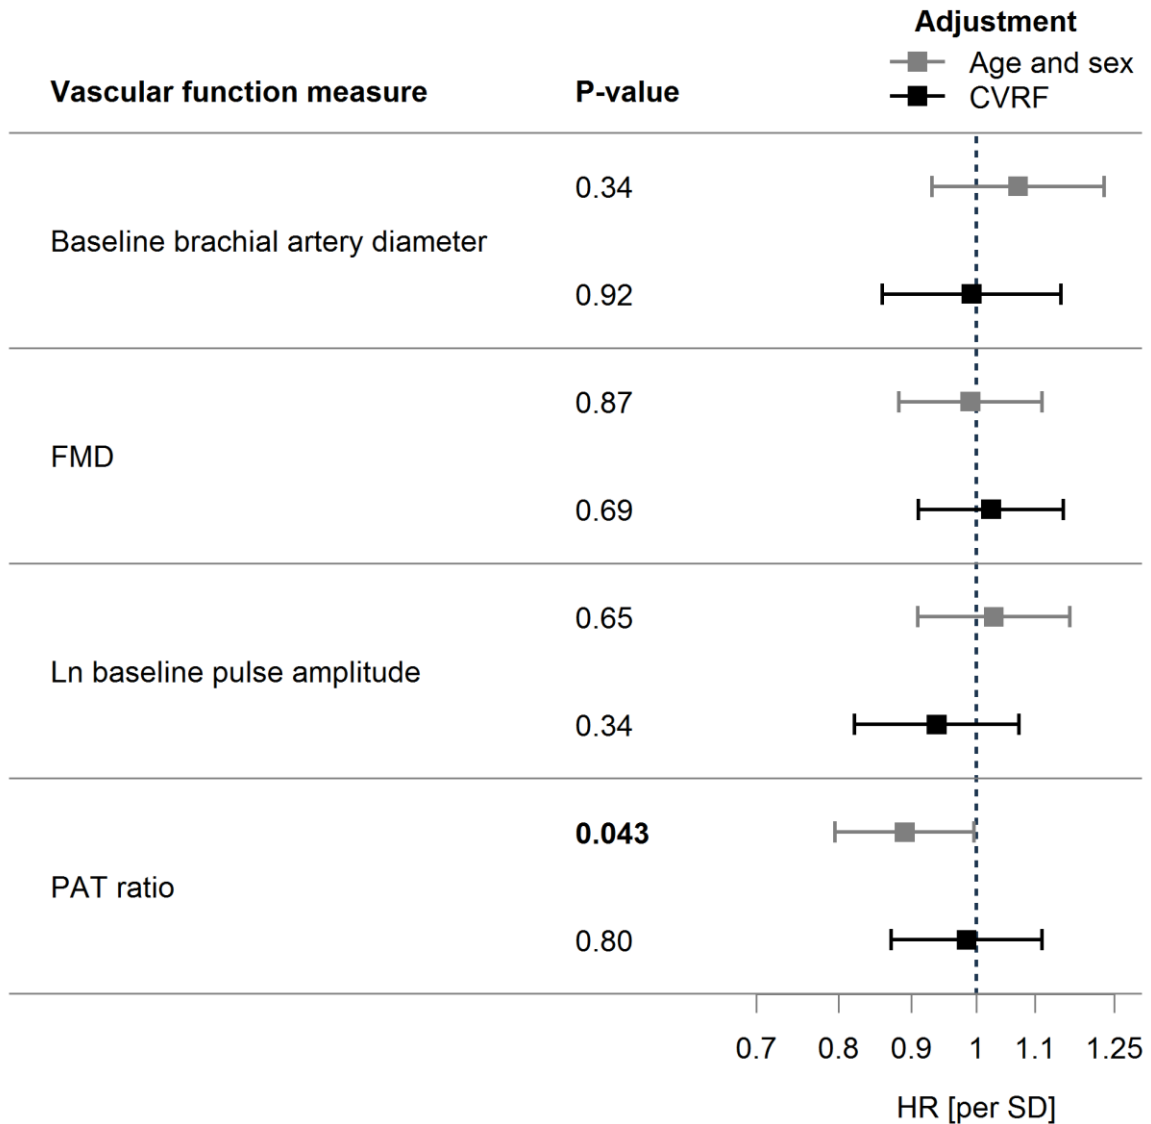

**Supplementary Figure 5.** Vascular function measures in relation to incident cardiovascular disease in multivariable-adjusted Cox regression analyses in the subgroup of individuals with an intermediate ten-year risk of fatal cardiovascular disease (268 events). Provided are hazard ratios (HR) per standard deviation (SD) increase in vascular function measure and 95% confidence intervals.

Age- and sex-adjusted and cardiovascular risk factors (CVRF)-adjusted models are presented. The latter include age, sex, current smoking, body mass index, systolic blood pressure, heart rate, hypertension treatment, diabetes, LDL/HDL cholesterol, lipid treatment, and prevalent cardiovascular disease. FMD stands for flow-mediated dilatation, PAT for peripheral arterial tonometry.

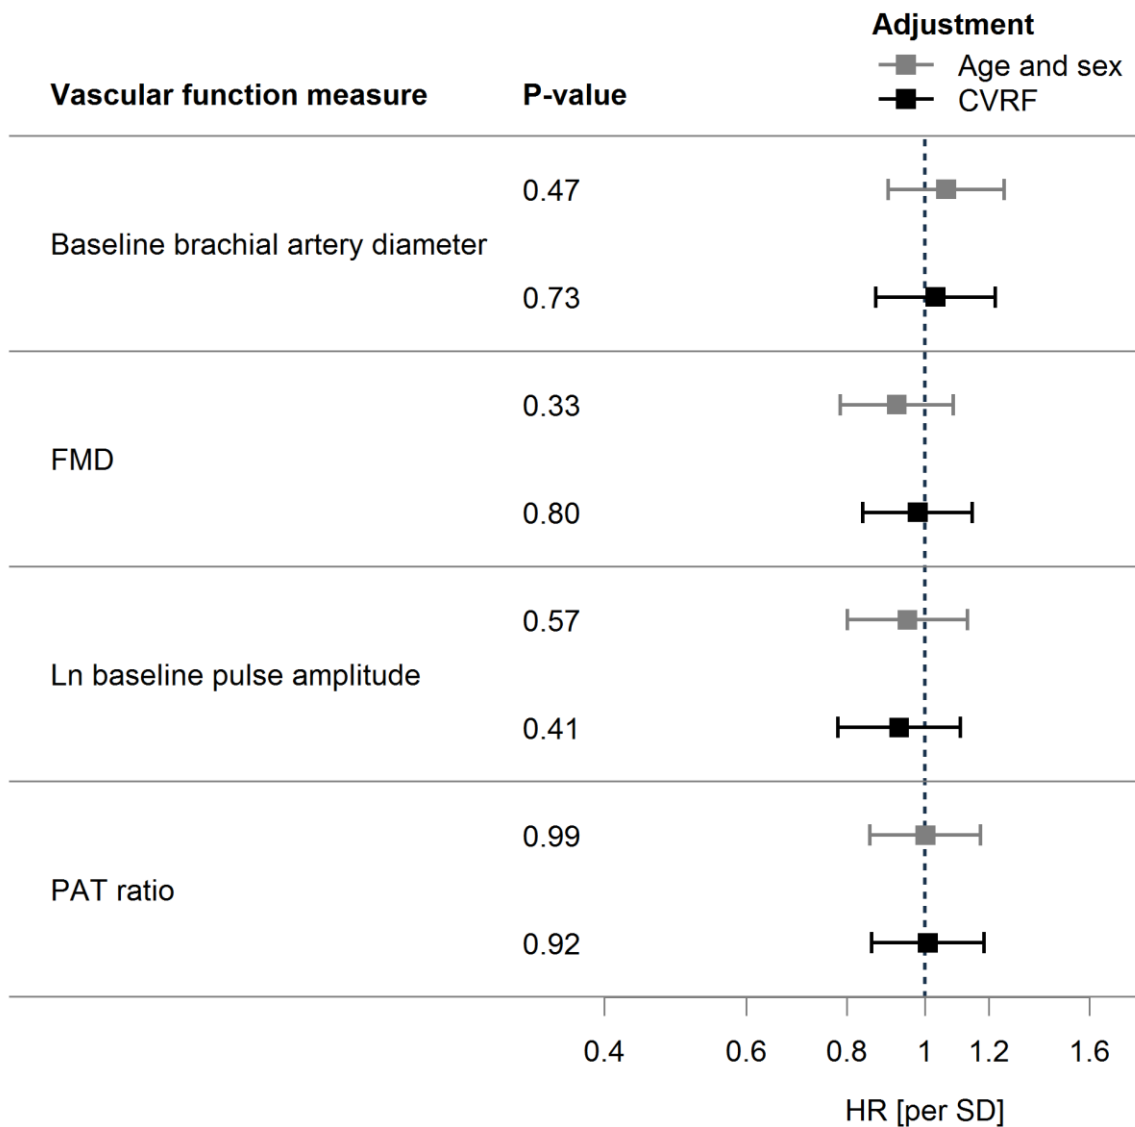

**Supplementary Figure 6.** Vascular function measures in relation to mortality in multivariable-adjusted Cox regression analyses in the subgroup of individuals with an intermediate ten-year risk of fatal cardiovascular disease (518 events). Provided are hazard ratios (HR) per standard deviation (SD) increase in vascular function measure and 95% confidence intervals.

Age- and sex-adjusted and cardiovascular risk factors (CVRF)-adjusted models are presented. The latter include age, sex, current smoking, body mass index, systolic blood pressure, heart rate, hypertension treatment, diabetes, LDL/HDL cholesterol, lipid treatment, and prevalent cardiovascular disease. FMD stands for flow-mediated dilatation, PAT for peripheral arterial tonometry.

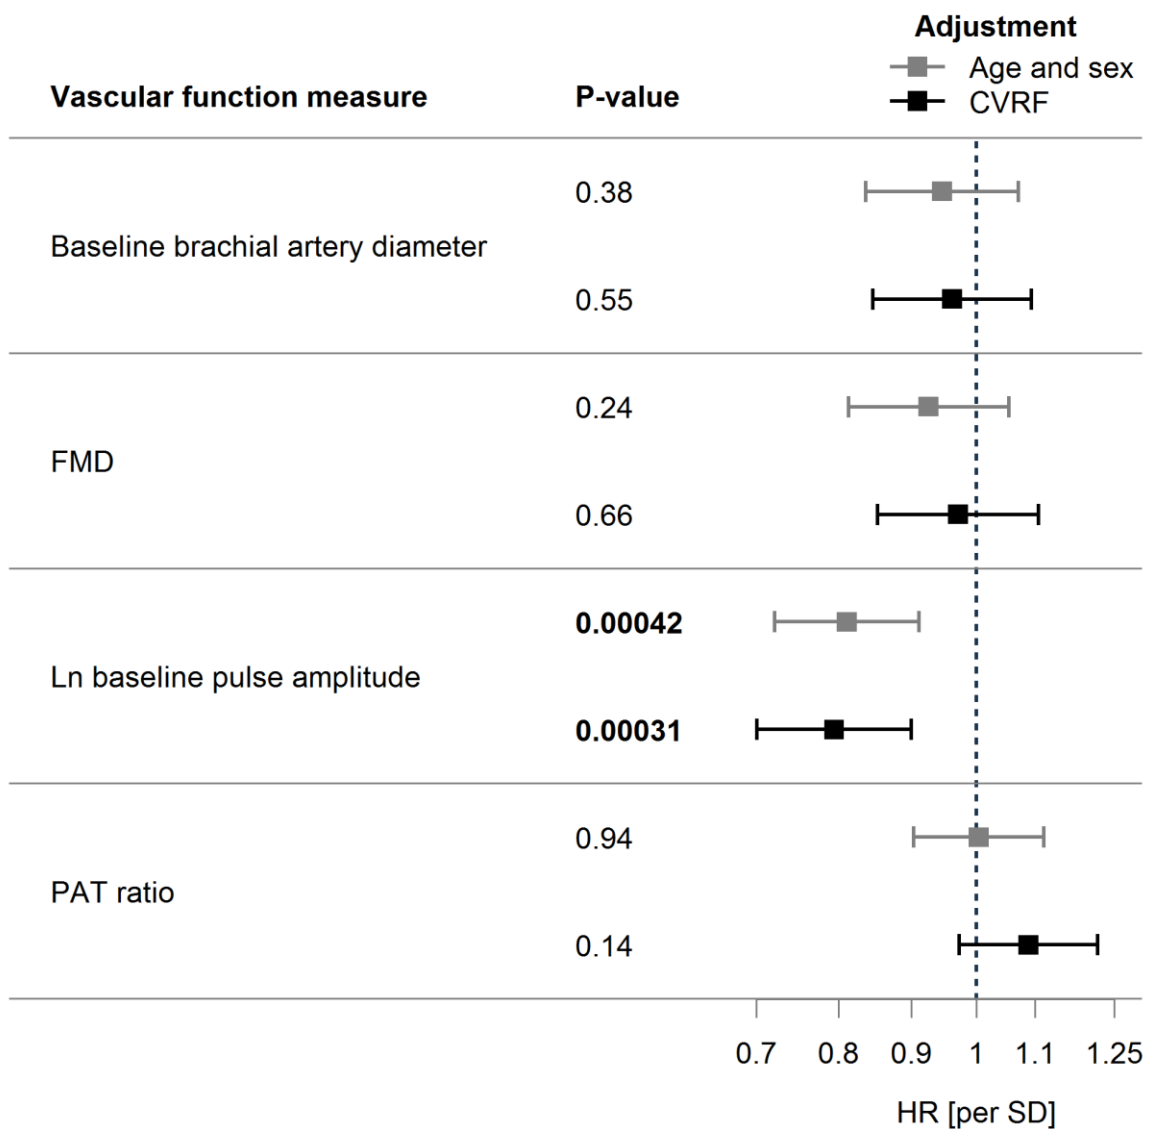

**Supplementary Figure 7.** Vascular function measures in relation to cardiac mortality in multivariable-adjusted Cox regression analyses in the subgroup of individuals with an intermediate ten-year risk of fatal cardiovascular disease (45 deaths). Provided are hazard ratios (HR) per standard deviation (SD) increase in vascular function measure and 95% confidence intervals.

Age- and sex-adjusted and cardiovascular risk factors (CVRF)-adjusted models are presented. The latter include age, sex, current smoking, body mass index, systolic blood pressure, heart rate, hypertension treatment, diabetes, LDL/HDL cholesterol, lipid treatment, and prevalent cardiovascular disease. FMD stands for flow-mediated dilatation, PAT for peripheral arterial tonometry.

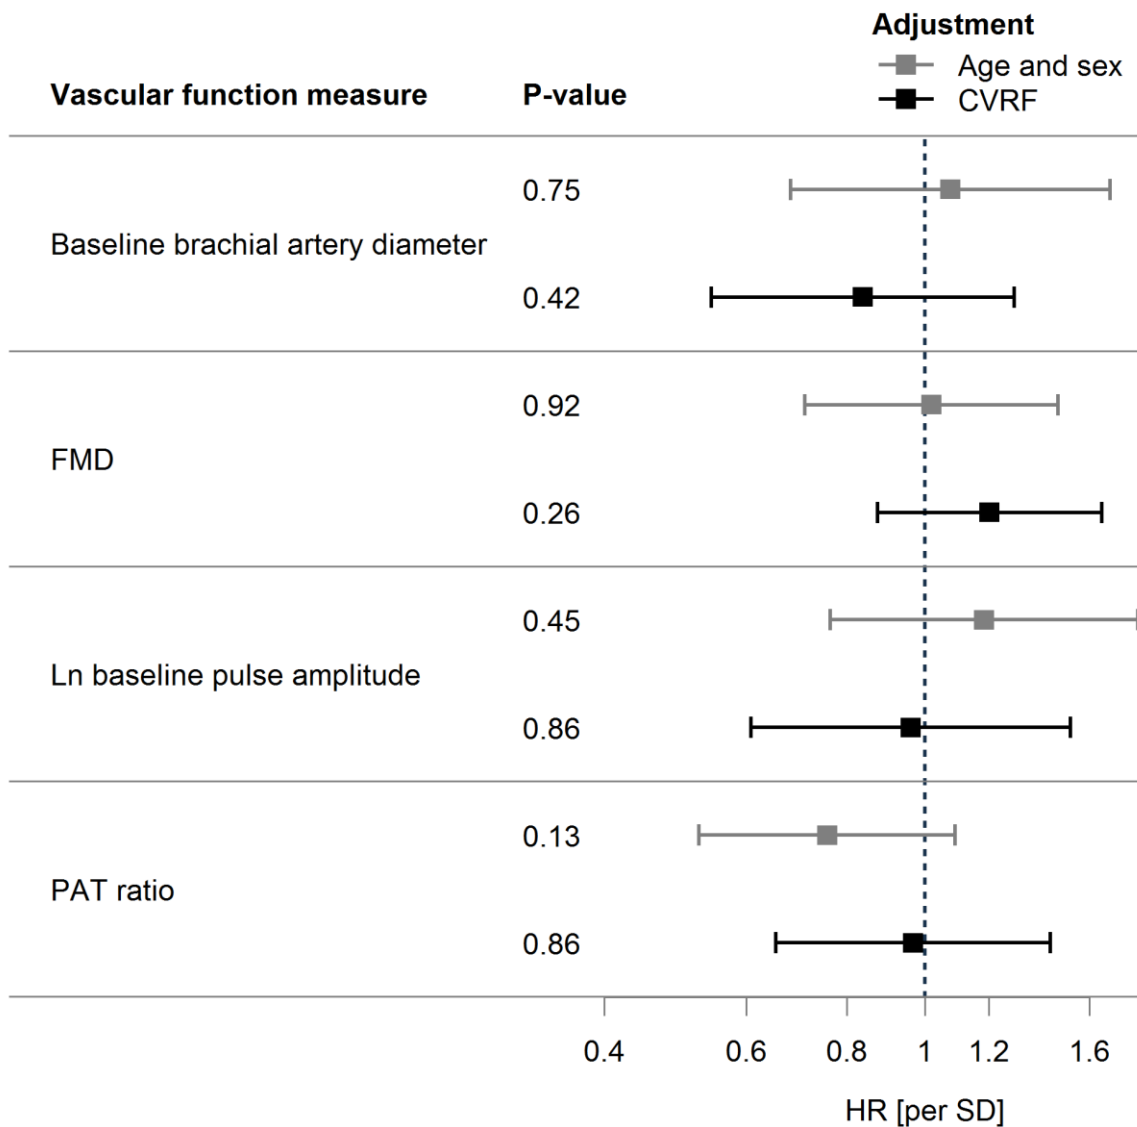

**Supplementary Figure 8.** Hazard ratios of baseline pulse amplitude plotted against age.

Dashed lines represent 95% confidence intervals. The gray line indicates a hazard ratio of 1.

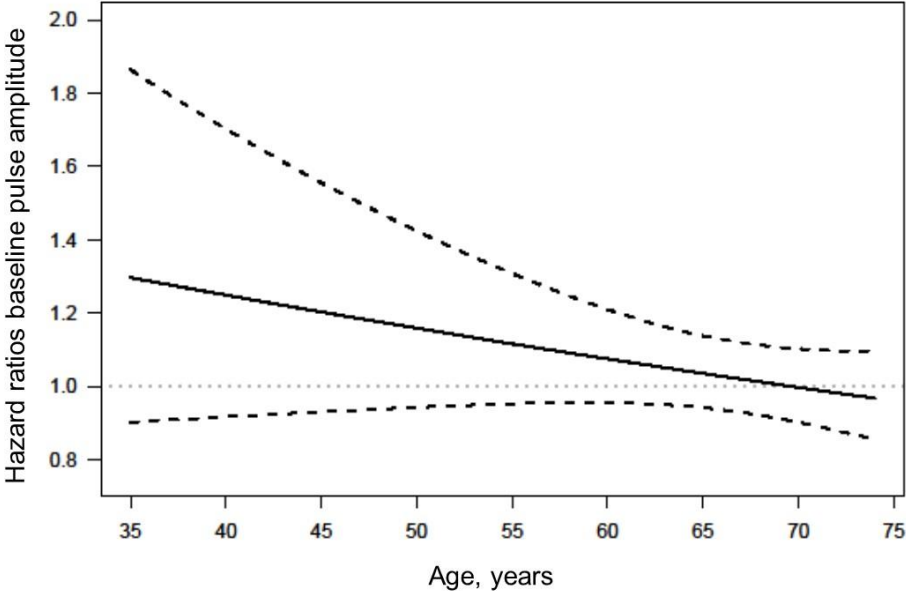

Supplement: cvab087_supplementary_data.pdf [file cvab087_supplementary_data.pdf]
